# Supplementary material for: Experiential Learning Interventions and Healthy Eating Outcomes in Children: A Systematic Literature Review
Source: MDPI journal article supplement (doi:10.3390/ijerph182010824), 2021-10-15
Supplement: s1 [file s1]

**Title: Experiential Learning Interventions and Healthy Eating Outcomes in Children: A Systematic Literature Review**

**Supplementary Table S2: Experiential learning strategies used by the included studies.**

| Activities                        | Types                                                         | Studies                                              | <i>n</i> |
|-----------------------------------|---------------------------------------------------------------|------------------------------------------------------|----------|
| Taste-testing                     | Fruits and/or Vegetables                                      | [44], [52], [48], [39], [40], [45], [56], [47], [57] | 9        |
|                                   | Healthy foods                                                 | [55]                                                 | 1        |
|                                   | Snacks                                                        | [46]                                                 | 1        |
|                                   | Foods                                                         | [59], [60], [56], [38], [43], [61], [62], [58]       | 8        |
| Cooking                           | Preparing foods                                               | [46], [53], [56]                                     | 3        |
|                                   | Fruit and vegetables                                          | [45], [56]                                           | 2        |
|                                   | Snacks                                                        | [46]                                                 | 1        |
|                                   | Other foods/meals                                             | [52]                                                 | 1        |
| Calculations/recording            | Sugar and fat                                                 | [55]                                                 | 1        |
|                                   | Veggie math                                                   | [41]                                                 | 1        |
|                                   | 3-day fruit and vegetable intake                              | [56]                                                 | 1        |
|                                   | Personal food pyramid                                         | [38]                                                 | 1        |
|                                   | Math activity                                                 | [54]                                                 | 1        |
| Shopping list and Food purchasing | Creating a shopping list                                      | [55]                                                 | 1        |
|                                   | Selecting food/meals                                          | [56], [38], [43], [58]                               | 4        |
|                                   | Simulated shopping                                            | [38]                                                 | 1        |
|                                   | Food classification                                           | [38]                                                 | 1        |
| Sensory evaluation                | Smell/touch/sight/sound of foods                              | [59], [60], [43], [54]                               | 4        |
| Gardening                         | Planting and harvesting                                       | [52], [40]                                           | 2        |
| Roleplay/modelling                | Comic book                                                    | [46]                                                 | 1        |
|                                   | Characters                                                    | [44]                                                 | 1        |
|                                   | Role playing                                                  | [59], [47]                                           | 2        |
| Games                             | Guessing food                                                 | [43], [39]                                           | 2        |
|                                   | Food labelling                                                | [49]                                                 | 1        |
|                                   | Competitions (eating fruits and vegetables)                   | [46]                                                 | 1        |
|                                   | Card/Board games                                              | [43], [51]                                           | 2        |
|                                   | Fun play                                                      | [56]                                                 | 1        |
|                                   | Mystery bag                                                   | [54]                                                 | 1        |
| Songs                             |                                                               | [59], [43], [50]                                     | 3        |
|                                   | Nursery rhyme                                                 | [60]                                                 | 1        |
| Storybook                         |                                                               | [44], [46], [60], [54], [48]                         | 5        |
|                                   | Making stories (characters)                                   | [39]                                                 | 1        |
| Creative activities               | Colouring                                                     | [59], [60]                                           | 2        |
|                                   | Drawing                                                       | [60], [54], [39]                                     | 3        |
|                                   | Collage                                                       | [39]                                                 | 1        |
|                                   | Portraits                                                     | [39]                                                 | 1        |
|                                   | Art and craft on F & V                                        |                                                      |          |
|                                   | Fruit and vegetable charts                                    | [43]                                                 | 1        |
|                                   | Posters/pamphlets                                             | [51], [50]                                           | 2        |
| Field trips                       | Imaginary trips/exploring places-eating fruits and vegetables | [59]                                                 | 1        |
