# Supplementary material for: Experiential Learning Interventions and Healthy Eating Outcomes in Children: A Systematic Literature Review
Source: Int J Environ Res Public Health. 2021 Oct 15;18(20):10824. doi: 10.3390/ijerph182010824 (PMC8535521; doi:10.3390/ijerph182010824)
Supplement: Supplementary file 1 [file ijerph-18-10824-s001.zip › Proofed Suplementary Table S1.xlsx]

## Sheet: Sheet1
Supplementary Table S1: Quality assessment of the included studies
Signalling questions	Response options	Vereecken et al., (2009) [38]	Witt et al., (2012) [39]	Brouwer and Neelon, (2013) [40]	Martínez-Andrade et al., (2014) [41]	Dazeley and Houston-Price, (2015) [42]	Jisoo et al., (2018) [43]	Perry et al., (1998) [44]	Bere et al., (2005) [45]	Bere et al., (2006) [46]	Chen et al., (2009) [47]	Fulkerson et al., (2010) [48]	Rosenkranz et al., (2010) [49]	Keihner et al., (2011) [50]	Katz et al., (2011) [51]	Wall et al., (2012) [52]	Brown et al., (2013) [53]	Habib-Mourad et al., (2014) [54]	Wells et al., (2015) [55]	Allirot et al., (2016) [56]	LaChausse, (2017) [57]	Schreinemachers et al., (2017) [58]	Schreinemachers et al., (2017) [59]	Keihner et al., (2017) [60]	Scherr et al., (2017) [61]	Allirot et al., (2018) [62]
Domain 1: Risk of bias arising from the randomization process
1.1 Was the allocation sequence random?	Y / PY / PN / N / NI	PY	Y	PY	PN	Y	Y	PY	Y	Y	Y	Y	PY	PY	PY	PY	Y	Y	Y	Y	Y	Y	Y	Y	Y	Y
1.2 Was the allocation sequence concealed until participants were enrolled and assigned to interventions?	Y / PY / PN / N / NI	Y	PY	Y	Y	PY	PY	PN	PY	PY	PY	Y	PN	PN	PN	PN	PY	Y	Y	PY	PN	PY	PY	PY	Y	PY
1.3 Did baseline differences between intervention groups suggest a problem with the randomization process?	Y / PY / PN / N / NI	PY	PY	PN	PN	PN	PN	PN	PN	PY	N	PY	PN	Y	Y	PY	PN	PN	PY	PN	PN	N	N	N	PN	PN
Risk-of-bias judgement	Low / High / Some concerns	Low	Low	Some concerns	High	Low	Low	Low	Low	Low	Low	Low	Some concerns	High	High	Low	Low	Low	Low	Low	Some concerns	Low	Low	Low	Some concerns	Low
Optional: What is the predicted direction of bias arising from the randomization process?	NA / Favours experimental / Favours comparator / Towards null /Away from null / Unpredictable	Unpredictable	Unpredictable	Unpredictable	Unpredictable	Unpredictable	Unpredictable	Unpredictable	Unpredictable	Unpredictable	Unpredictable	Unpredictable	Unpredictable	Unpredictable	Unpredictable	Unpredictable	Unpredictable	Unpredictable	Unpredictable	Unpredictable	Unpredictable	Unpredictable	Unpredictable	Unpredictable	Unpredictable	Unpredictable
Domain 2: Risk of bias due to deviations from the intended interventions (effect of assignment to intervention)
2.1. Were participants aware of their assigned intervention during the trial?	Y / PY / PN / N / NI	Y	PN	PY	PY	N	N	PY	PN	Y	PN	PN	N	PY	PY	PY	N	PN	PN	N	PY	N	N	PN	N	N
2.2. Were carers and people delivering the interventions aware of participants' assigned intervention during the trial?	Y / PY / PN / N / NI	PY	PY	PY	Y	PY	PY	Y	Y	Y	PN	NI	PN	Y	Y	PY	PY	PN	NI	PY	Y	PN	PN	Y	PY	PY
2.3. If Y/PY/NI to 2.1 or 2.2: Were there deviations from the intended intervention that arose because of the experimental context?	NA / Y / PY / PN / N / NI	PN	NI	N	PN	PY	PY	N	NI	NI	NA	NI	PN	PY	PY	PN	PY	NA	NI	PY	PN	PN	PN	PN	PY	PY
2.4. If Y/PY to 2.3: Were these deviations from intended intervention balanced between groups?	NA / Y / PY / PN / N / NI	NI	NI	N	Y	NI	NI	N	NI	NI	NA	NI	PY	PY	PY	NI	NI	NA	NI	NI	Y	NI	NI	NA	NA	NI
2.5 If N/PN/NI to 2.4: Were these deviations likely to have affected the outcome?	NA / Y / PY / PN / N / NI	NI	NI	N	PN	PN	PN	N	PN	PN	NA	NI	PN	PY	PY	NI	PN	NA	NI	PN	PN	PN	PN	PY	NA	PN
2.6 Was an appropriate analysis used to estimate the effect of assignment to intervention?	Y / PY / PN / N / NI	Y	PY	PY	Y	Y	Y	Y	Y	Y	Y	PY	PY	PY	PY	PY	Y	Y	PY	Y	Y	Y	Y	PY	Y	Y
2.7 If N/PN/NI to 2.6: Was there potential for a substantial impact (on the result) of the failure to analyse participants in the group to which they were randomized?	NA / Y / PY / PN / N / NI	PN	PN	N	PN	NI	NI	N	PN	PN	NA	PN	PN	PY	PY	PN	NI	NA	PN	NI	PN	NI	NI	PY	NI	NI
Risk-of-bias judgement	Low / High / Some concerns	Some concerns	Low	Some concerns	High	Low	Low	Low	Some concerns	Some concerns	Some concerns	High	Some concerns	High	High	Some concerns	Low	Some concerns	Low	Low	Low	Some concerns	Some concerns	Some concerns	Low	Low
Optional: What is the predicted direction of bias due to deviations from intended interventions?	NA / Favours experimental / Favours comparator / Towards null /Away from null / Unpredictable	Unpredictable	Unpredictable	Unpredictable	Unpredictable	Unpredictable	Unpredictable	Unpredictable	Unpredictable	Unpredictable	Unpredictable	Unpredictable	Unpredictable	Unpredictable	Unpredictable	Unpredictable	Unpredictable	Unpredictable	Unpredictable	Unpredictable	Unpredictable	Unpredictable	Unpredictable	Unpredictable	Unpredictable	Unpredictable
Domain 2: Risk of bias due to deviations from the intended interventions (effect of adhering to intervention)
2.1. Were participants aware of their assigned intervention during the trial?	Y / PY / PN / N / NI	PN	N	PY	Y	N	N	PY	PN	Y	PN	PN	PY	PY	PY	PY	N	PN	PN	N	Y	PN	PN	PN	N	N
2.2. Were carers and people delivering the interventions aware of participants' assigned intervention during the trial?	Y / PY / PN / N / NI	PY	PY	Y	Y	PY	PY	PY	Y	Y	PN	PY	PY	PY	PY	Y	PY	PN	PY	PY	Y	PY	PY	Y	PY	PY
2.3. If Y/PY/NI to 2.1 or 2.2: Were important co-interventions balanced across intervention groups?	NA / Y / PY / PN / N / NI	NI	PY	N	PN	NA	NA	PN	NI	NI	NA	PY	Y	PN	PN	PN	NA	NA	PY	NA	PN	PY	PY	NI	NA	NA
2.4. Were there failures in implementing the intervention that could have affected the outcome?	Y / PY / PN / N / NI	PN	PN	PN	PN	NA	NA	N	PN	PN	PY	PN	PY	PY	PY	PY	NA	PY	PN	NA	PN	NI	NI	PY	NA	NA
2.5. Was there non-adherence to the assigned intervention regimen that could have affected participants’ outcomes?	Y / PY / PN / N / NI	PN	PN	N	PY	PN	PN	PN	PN	PN	PY	PN	PN	PY	PY	PY	PN	PY	PN	PN	N	PN	PN	PY	PN	PN
2.6. If N/PN/NI to 2.3 or 2.5 or Y/PY/NI to 2.4: Was an appropriate analysis used to estimate the effect of adhering to the intervention?	NA / Y / PY / PN / N / NI	PY	Y	PN	N	PN	PN	PN	Y	Y	PY	Y	PN	NU	NU	PY	PN	PY	Y	PN	PY	Y	Y	PY	PN	PN
Risk-of-bias judgement	Low / High / Some concerns	Some concerns	Low	Some concerns	High	Low	Low	Low	Low	Low	Some concerns	Some concerns	Low	High	High	Some concerns	Low	Some concerns	low	Low	Low	Low	Low	Some concerns	Low	Low
Optional: What is the predicted direction of bias due to deviations from intended interventions?	NA / Favours experimental / Favours comparator / Towards null /Away from null / Unpredictable	Unpredictable	Unpredictable	Unpredictable	Unpredictable	Unpredictable	Unpredictable	Unpredictable	Unpredictable	Unpredictable	Unpredictable	Unpredictable	Unpredictable	Unpredictable	Unpredictable	Unpredictable	Unpredictable	Unpredictable	Unpredictable	Unpredictable	Unpredictable	Unpredictable	Unpredictable	Unpredictable	Unpredictable	Unpredictable
Domain 3: Missing outcome data
3.1 Were data for this outcome available for all, or nearly all, participants randomized?	Y / PY / PN / N / NI	PY	PY	NI	Y	Y	Y	N	N	PN	N	PY	PY	PN	PN	Y	Y	N	PY	Y	Y	PY	PY	PY	Y	Y
3.2 If N/PN/NI to 3.1: Is there evidence that the result was not biased by missing outcome data?	NA / Y / PY / PN / N / NI	NI	PY	PN	PN	NA	NA	N	NI	NI	NI	NI	Y	N	N	P	NA	NI	NI	NA	PN	PY	PY	Y	NA	NA
3.3 If N/PN to 3.2: Could missingness in the outcome depend on its true value?	NA / Y / PY / PN / N / NI	NI	NI	PN	PN	NA	NA	PN	NA	NA	NA	NI	PN	PY	PY	NI	NA	NA	NI	NA	PN	NI	NI	NA	NA	NA
3.4 If Y/PY/NI to 3.3: Is it likely that missingness in the outcome depended on its true value?	NA / Y / PY / PN / N / NI	PN	N	NI	PN	NA	NA	PN	NA	NA	NA	PN	PN	PY	PY	NI	NA	NA	PN	NA	PN	NI	NI	NA	NA	NA
Risk-of-bias judgement	Low / High / Some concerns	Low	Low	Low	Low	Low	Low	Low	Low	Low	Some concerns	Low	Low	High	High	Low	Low	Some concerns	Low	Low	Low	Low	Low	Some concerns	Low	Low
Optional: What is the predicted direction of bias due to missing outcome data?	NA / Favours experimental / Favours comparator / Towards null /Away from null / Unpredictable	Unpredictable	Unpredictable	Unpredictable	Unpredictable	Unpredictable	Unpredictable	Unpredictable	Unpredictable	Unpredictable	Unpredictable	Unpredictable	Unpredictable	Unpredictable	Unpredictable	Unpredictable	Unpredictable	Unpredictable	Unpredictable	Unpredictable	Unpredictable	Unpredictable	Unpredictable	Unpredictable	Unpredictable	Unpredictable
Domain 4: Risk of bias in measurement of the outcome
4.1 Was the method of measuring the outcome inappropriate?	Y / PY / PN / N / NI	NI	N	PN	N	N	N	PN	N	N	N	PN	PY	PN	PN	PY	N	PN	PN	N	N	N	N	N	N	N
4.2 Could measurement or ascertainment of the outcome have differed between intervention groups?	Y / PY / PN / N / NI	PN	N	N	N	NA	NA	N	NA	NA	NA	PN	PY	PY	PY	PY	NA	NA	PN	NA	N	PN	PN	PY	N	NA
4.3 If N/PN/NI to 4.1 and 4.2: Were outcome assessors aware of the intervention received by study participants?	Y / PY / PN / N / NI	PY	PY	NI	PN	PY	PY	N	Y	Y	Y	PY	PN	Y	Y	PY	PY	Y	PY	PY	PN	PN	PN	Y	PY	PY
4.4 If Y/PY/NI to 4.3: Could assessment of the outcome have been influenced by knowledge of intervention received?	NA / Y / PY / PN / N / NI	PY	PN	PY	PY	NA	NA	PY	PN	PN	PN	PN	PY	Y	Y	PY	NA	PN	PN	NA	PY	N	N	PY	NA	NA
4.5 If Y/PY/NI to 4.4: Is it likely that assessment of the outcome was influenced by knowledge of intervention received?	NA / Y / PY / PN / N / NI	PN	PY	Y	PY	NA	NA	PY	PN	PN	PN	PN	N	Y	Y	PY	NA	PN	PN	NA	PY	PN	PN	PY	PY	NA
Risk-of-bias judgement	Low / High / Some concerns	Some concerns	Low	Some concerns	High	Low	Low	Some concerns	Low	Low	Low	Some concerns	Some concerns	High	High	Some concerns	Low	Low	Some concerns	Low	Low	Low	Low	Some concerns	High	Low
Optional: What is the predicted direction of bias in measurement of the outcome?	NA / Favours experimental / Favours comparator / Towards null /Away from null / Unpredictable	Unpredictable	Unpredictable	Unpredictable	Unpredictable	Unpredictable	Unpredictable	Unpredictable	Unpredictable	Unpredictable	Unpredictable	Unpredictable	Unpredictable	Unpredictable	Unpredictable	Unpredictable	Unpredictable	Unpredictable	Unpredictable	Unpredictable	Unpredictable	Unpredictable	Unpredictable	Unpredictable	Unpredictable	Unpredictable
Domain 5: Risk of bias in selection of the reported result
5.1 Were the data that produced this result analysed in accordance with a pre-specified analysis plan that was finalized before unblinded outcome data were available for analysis?	Y / PY / PN / N / NI	PY	Y	PN	PN	PY	PY	PN	Y	Y	PY	PY	PY	PY	PY	PY	PY	PY	PY	PY	PN	PY	PY	PY	PY	PY
Is the numerical result being assessed likely to have been selected, on the basis of the results, from…
5.2. ... multiple outcome measurements (e.g. scales, definitions, time points) within the outcome domain?	Y / PY / PN / N / NI	NI	NI	PY	PN	NA	NA	Y	NA	NA	NA	NI	PN	NA	NA	PN	NA	NA	NI	NA	PN	PY	PY	NA	PN	NA
5.3 ... multiple analyses of the data?	Y / PY / PN / N / NI	PY	PY	N	PN	PY	PY	PN	NI	NI	NI	PY	Y			PN	PY	NI	PY	PY	PN	PY	PY	NA	PN	PY
Risk-of-bias judgement	Low / High / Some concerns	Some concerns	Some concerns	High	Some concerns	Low	Low	Low	Low	Low	Low	Some concerns	Some concerns	NA	NA	Some concerns	Low	Low	Some concerns	Low	Low	Low	Low	Some concerns	Low	Low
Optional: What is the predicted direction of bias due to selection of the reported result?	NA / Favours experimental / Favours comparator / Towards null /Away from null / Unpredictable	Unpredictable	Unpredictable	Unpredictable	Unpredictable	Unpredictable	Unpredictable	Unpredictable	Unpredictable	Unpredictable	Unpredictable	Unpredictable	Unpredictable	Unpredictable	Unpredictable	Unpredictable	Unpredictable	Unpredictable	Unpredictable	Unpredictable	Unpredictable	Unpredictable	Unpredictable	Unpredictable	Unpredictable	Unpredictable
Overall risk of bias
Risk-of-bias judgement	Low / High / Some concerns	Some concerns	Low	Some concerns	High	Low	Low	Low	Low	Low	Some concerns	High	Low	High	High	Some concerns	Low	Some concerns	Low	Low	Low	Low	Low	Some concerns	High	Low
Optional: What is the predicted direction of bias due to selection of the reported result?	NA / Favours experimental / Favours comparator / Towards null /Away from null / Unpredictable	Unpredictable	Unpredictable	Unpredictable	Unpredictable	Unpredictable	Unpredictable	Unpredictable	Unpredictable	Unpredictable	Unpredictable	Unpredictable	Unpredictable	Unpredictable	Unpredictable	Unpredictable	Unpredictable	Unpredictable	Unpredictable	Unpredictable	Unpredictable	Unpredictable	Unpredictable	Unpredictable	Unpredictable	Unpredictable
